# Supplementary material for: Tailoring of Multisource Deposition Conditions towards Required Chemical Composition of Thin Films
Source: MDPI journal article supplement (doi:10.3390/nano12111830), 2022-05-27
Supplement: s1 [file s1]

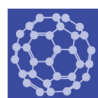

## Article

# Supplementary Data: Tailoring of Multisource Deposition Conditions towards Required Chemical Composition of Thin Films

Jan Gutwirth <sup>1,\*</sup>, Magdaléna Kotrla <sup>1</sup>, Tomáš Halenkovič <sup>1</sup>, Virginie Nazabal <sup>1,2</sup> and Petr Němec <sup>1,\*</sup>

<sup>1</sup> Department of Graphic Arts and Photophysics, Faculty of Chemical Technology, University of Pardubice, Studentská 573, 532 10 Pardubice, Czech Republic; magdalena.kotrla@student.upce.cz (M.K.); tomas.halenkovic@upce.cz (T.H.)

<sup>2</sup> CNRS, ISCR-UMR 6226, Université de Rennes 1, F-35000 Rennes, France; virginie.nazabal@univ-rennes1.fr

\* Correspondence: jan.gutwirth@upce.cz (J.G.); petr.nemec@upce.cz (P.N.)

## 1. Supplementary Results

Table S1. Model input parameters.

|                                               | GaSb    | GaTe    | Te      |
|-----------------------------------------------|---------|---------|---------|
| Density $\rho$ [kg·m <sup>-3</sup> ]          | 5610    | 5440    | 6240    |
| Molar/Atomic mass $M$ [kg·mol <sup>-1</sup> ] | 0.19148 | 0.19732 | 0.12760 |

Table S2. Fits of deposition rates of GaSb–GaTe co-deposition. Black ink represents interpolated points while red ink represents extrapolated points with respect to the performed trial depositions.

| Power | GaSb                                           | GaTe                                           | GaSb                                             | GaTe                                             | GaSb                                              | GaTe                                              |
|-------|------------------------------------------------|------------------------------------------------|--------------------------------------------------|--------------------------------------------------|---------------------------------------------------|---------------------------------------------------|
| [W]   | [m·min <sup>-1</sup> ]<br>1 × 10 <sup>-9</sup> | [m·min <sup>-1</sup> ]<br>1 × 10 <sup>-9</sup> | [kg·min <sup>-1</sup> ]<br>1 × 10 <sup>-12</sup> | [kg·min <sup>-1</sup> ]<br>1 × 10 <sup>-12</sup> | [mol·min <sup>-1</sup> ]<br>1 × 10 <sup>-12</sup> | [mol·min <sup>-1</sup> ]<br>1 × 10 <sup>-12</sup> |
| 7     | 1.04                                           |                                                | 0.18                                             |                                                  | 0.97                                              |                                                   |
| 8     | 1.23                                           |                                                | 0.22                                             |                                                  | 1.14                                              |                                                   |
| 9     | 1.43                                           |                                                | 0.25                                             |                                                  | 1.33                                              |                                                   |
| 10    | 1.64                                           | 1.29                                           | 0.29                                             | 0.24                                             | 1.53                                              | 1.20                                              |
| 11    | 1.86                                           | 1.52                                           | 0.33                                             | 0.28                                             | 1.74                                              | 1.42                                              |
| 12    | 2.10                                           | 1.75                                           | 0.37                                             | 0.32                                             | 1.96                                              | 1.63                                              |
| 13    | 2.35                                           | 1.98                                           | 0.42                                             | 0.36                                             | 2.19                                              | 1.84                                              |
| 14    | 2.62                                           | 2.21                                           | 0.47                                             | 0.41                                             | 2.44                                              | 2.06                                              |
| 15    | 2.90                                           | 2.44                                           | 0.52                                             | 0.45                                             | 2.70                                              | 2.27                                              |
| 16    | 3.20                                           | 2.66                                           | 0.57                                             | 0.49                                             | 2.98                                              | 2.48                                              |
| 17    | 3.51                                           | 2.89                                           | 0.63                                             | 0.53                                             | 3.27                                              | 2.70                                              |
| 18    | 3.85                                           | 3.12                                           | 0.69                                             | 0.57                                             | 3.58                                              | 2.91                                              |
| 19    | 4.20                                           | 3.35                                           | 0.75                                             | 0.62                                             | 3.91                                              | 3.12                                              |
| 20    | 4.57                                           | 3.58                                           | 0.81                                             | 0.66                                             | 4.25                                              | 3.34                                              |
| 21    | 4.96                                           | 3.81                                           | 0.88                                             | 0.70                                             | 4.62                                              | 3.55                                              |
| 22    |                                                | 4.04                                           |                                                  | 0.74                                             |                                                   | 3.76                                              |
| 23    |                                                | 4.27                                           |                                                  | 0.78                                             |                                                   | 3.98                                              |

**Table S3.** Fits of deposition rates of GaSb-Te co-deposition. Black ink represents interpolated points while red ink represents extrapolated points with respect to performed trial depositions.

| Power | GaSb                                           | Te                                             | GaSb                                             | Te                                               | GaSb                                              | Te                                                |
|-------|------------------------------------------------|------------------------------------------------|--------------------------------------------------|--------------------------------------------------|---------------------------------------------------|---------------------------------------------------|
| [W]   | [m·min <sup>-1</sup> ]<br>1 × 10 <sup>-9</sup> | [m·min <sup>-1</sup> ]<br>1 × 10 <sup>-9</sup> | [kg·min <sup>-1</sup> ]<br>1 × 10 <sup>-12</sup> | [kg·min <sup>-1</sup> ]<br>1 × 10 <sup>-12</sup> | [mol·min <sup>-1</sup> ]<br>1 × 10 <sup>-12</sup> | [mol·min <sup>-1</sup> ]<br>1 × 10 <sup>-12</sup> |
| 4     |                                                | 1.62                                           |                                                  | 0.26                                             |                                                   | 2.03                                              |
| 5     |                                                | 2.55                                           |                                                  | 0.41                                             |                                                   | 3.21                                              |
| 6     |                                                | 3.51                                           |                                                  | 0.56                                             |                                                   | 4.41                                              |
| 7     |                                                | 4.49                                           |                                                  | 0.72                                             |                                                   | 5.63                                              |
| 8     |                                                | 5.49                                           |                                                  | 0.88                                             |                                                   | 6.89                                              |
| 9     |                                                | 6.51                                           |                                                  | 1.04                                             |                                                   | 8.18                                              |
| 10    | 1.59                                           | 7.56                                           | 0.28                                             | 1.21                                             | 1.48                                              | 9.49                                              |
| 11    | 1.88                                           | 8.63                                           | 0.34                                             | 1.38                                             | 1.75                                              | 10.84                                             |
| 12    | 2.18                                           | 9.73                                           | 0.39                                             | 1.56                                             | 2.03                                              | 12.22                                             |
| 13    | 2.47                                           | 10.85                                          | 0.44                                             | 1.74                                             | 2.30                                              | 13.63                                             |
| 14    | 2.76                                           | 12.00                                          | 0.49                                             | 1.92                                             | 2.57                                              | 15.07                                             |
| 15    | 3.05                                           | 13.17                                          | 0.54                                             | 2.11                                             | 2.84                                              | 16.54                                             |
| 16    | 3.34                                           | 14.37                                          | 0.59                                             | 2.30                                             | 3.10                                              | 18.05                                             |
| 17    | 3.62                                           | 15.61                                          | 0.65                                             | 2.50                                             | 3.37                                              | 19.60                                             |
| 18    | 3.90                                           | 16.86                                          | 0.70                                             | 2.70                                             | 3.63                                              | 21.18                                             |
| 19    | 4.18                                           | 18.15                                          | 0.74                                             | 2.91                                             | 3.89                                              | 22.80                                             |
| 20    | 4.46                                           | 19.47                                          | 0.79                                             | 3.12                                             | 4.15                                              | 24.45                                             |
| 21    | 4.73                                           |                                                | 0.84                                             |                                                  | 4.40                                              |                                                   |
| 22    | 5.00                                           |                                                | 0.89                                             |                                                  | 4.66                                              |                                                   |
| 23    | 5.27                                           |                                                | 0.94                                             |                                                  | 4.91                                              |                                                   |
| 24    | 5.54                                           |                                                | 0.99                                             |                                                  | 5.16                                              |                                                   |
| 25    | 5.80                                           |                                                | 1.03                                             |                                                  | 5.40                                              |                                                   |
| 26    | 6.07                                           |                                                | 1.08                                             |                                                  | 5.65                                              |                                                   |
| 27    | 6.33                                           |                                                | 1.13                                             |                                                  | 5.89                                              |                                                   |
| 28    | 6.59                                           |                                                | 1.17                                             |                                                  | 6.13                                              |                                                   |
| 29    | 6.85                                           |                                                | 1.22                                             |                                                  | 6.37                                              |                                                   |
| 30    | 7.10                                           |                                                | 1.27                                             |                                                  | 6.61                                              |                                                   |
| 31    | 7.35                                           |                                                | 1.31                                             |                                                  | 6.85                                              |                                                   |
| 32    | 7.60                                           |                                                | 1.36                                             |                                                  | 7.08                                              |                                                   |
| 33    | 7.85                                           |                                                | 1.40                                             |                                                  | 7.31                                              |                                                   |
| 34    | 8.10                                           |                                                | 1.44                                             |                                                  | 7.54                                              |                                                   |
| 35    | 8.35                                           |                                                | 1.49                                             |                                                  | 7.77                                              |                                                   |

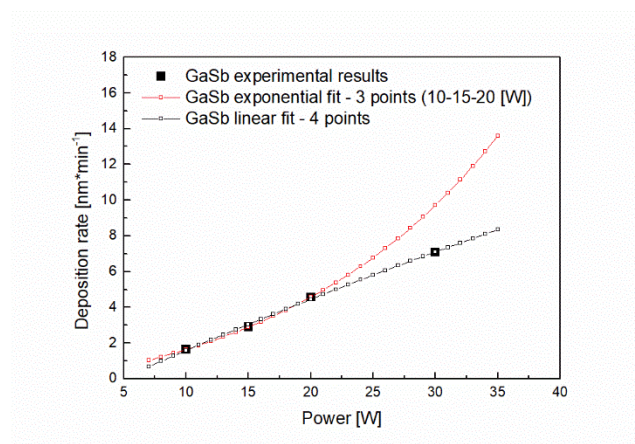

**Figure S1.** Comparison of deposition rate on deposition power dependency for GaSb. Experimentally obtained points (full marks) and fits - 3-point (10–15–20 W) exponential fit used for GaSb–GaTe co-depositions in range 7–21 W (red empty marks/line) and 4-point (10–15–20–30 W) linear fit used for GaSb–Te co-depositions in range 20–35 W (black empty marks/line).

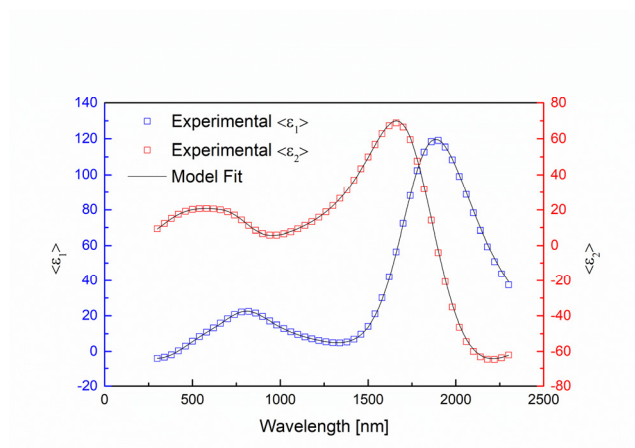

**Figure S2.** The comparison of experimentally obtained data and the model fit for GaSb thin film sputtered at power of 10 W. The experimental real  $\langle \epsilon_1 \rangle$  and imaginary  $\langle \epsilon_2 \rangle$  parts of pseudodielectric function were determined by UV-Vis-NIR ellipsometer (angle of incidence: 70°).

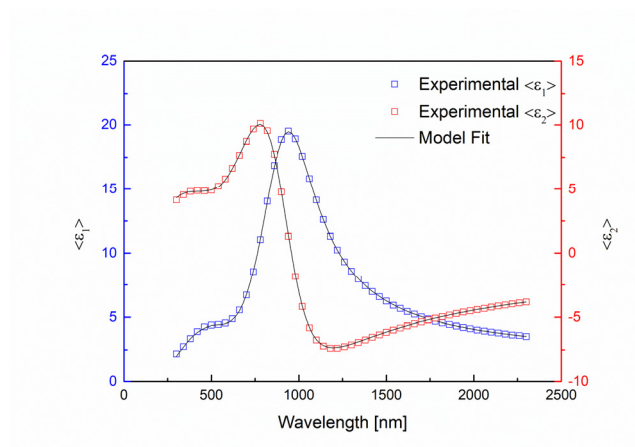

**Figure S3.** The comparison of experimentally obtained data and the model fit for GaTe thin film sputtered at power of 10 W. The experimental real  $\langle \epsilon_1 \rangle$  and imaginary  $\langle \epsilon_2 \rangle$  parts of pseudodielectric function were determined by UV-Vis-NIR ellipsometer (angle of incidence: 70°).

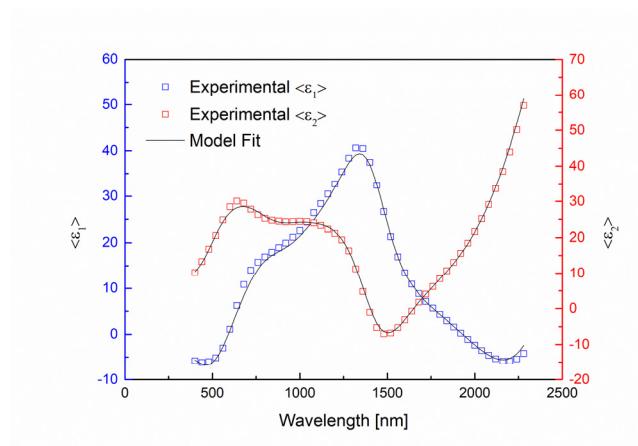

**Figure S4.** The comparison of experimentally obtained data and the model fit for Te thin film sputtered at power of 10 W. The experimental real  $\langle \epsilon_1 \rangle$  and imaginary  $\langle \epsilon_2 \rangle$  parts of pseudodielectric function were determined by UV-Vis-NIR ellipsometer (angle of incidence:  $70^\circ$ ).

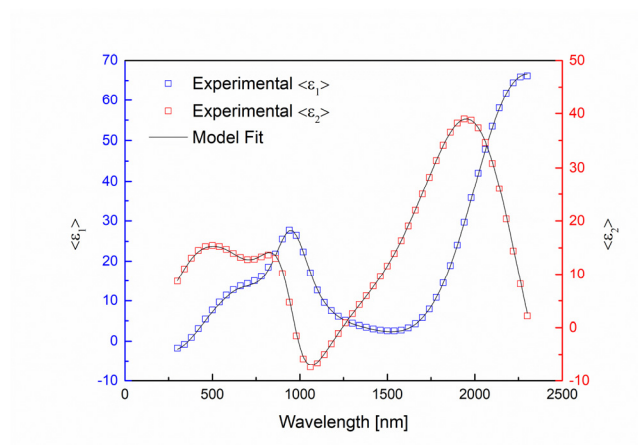

**Figure S5.** The comparison of experimentally obtained data and the model fit for co-sputtered GaSb-Te thin film (the applied power on cathodes: GaSb 30 W and Te 6 W). The experimental real  $\langle \epsilon_1 \rangle$  and imaginary  $\langle \epsilon_2 \rangle$  parts of pseudodielectric function were determined by UV-Vis-NIR ellipsometer (angle of incidence:  $70^\circ$ ).
